# Supplementary material for: Detection of terminal mismatches on DNA duplexes with fluorescent oligonucleotides
Source: Royal Society of Chemistry journal article supplement (doi:10.1039/b602262f), 2006-01-01
Supplement: b602262f.pdf [file b602262f.pdf]

## SUPPORTING INFORMATION

### **Detection of Terminal Mismatches on DNA Duplexes with Fluorescent Oligonucleotides**

Ulysse Asseline<sup>\*</sup>, Marcel Chassignol, Yves Aubert and Victoria Roig

*Centre de Biophysique Moléculaire, CNRS UPR 4301, affiliated with the University of  
Orléans and with INSERM.*

*Rue Charles Sadron, 45071 Orléans Cedex 02, France  
asseline@cnrs-orleans.fr*

**Fluorescence data**

---

**Influence of the presence of mismatches at the penultimate or last two positions of the duplex**

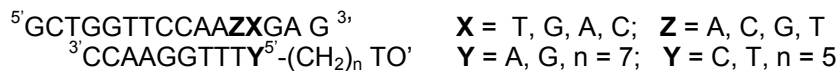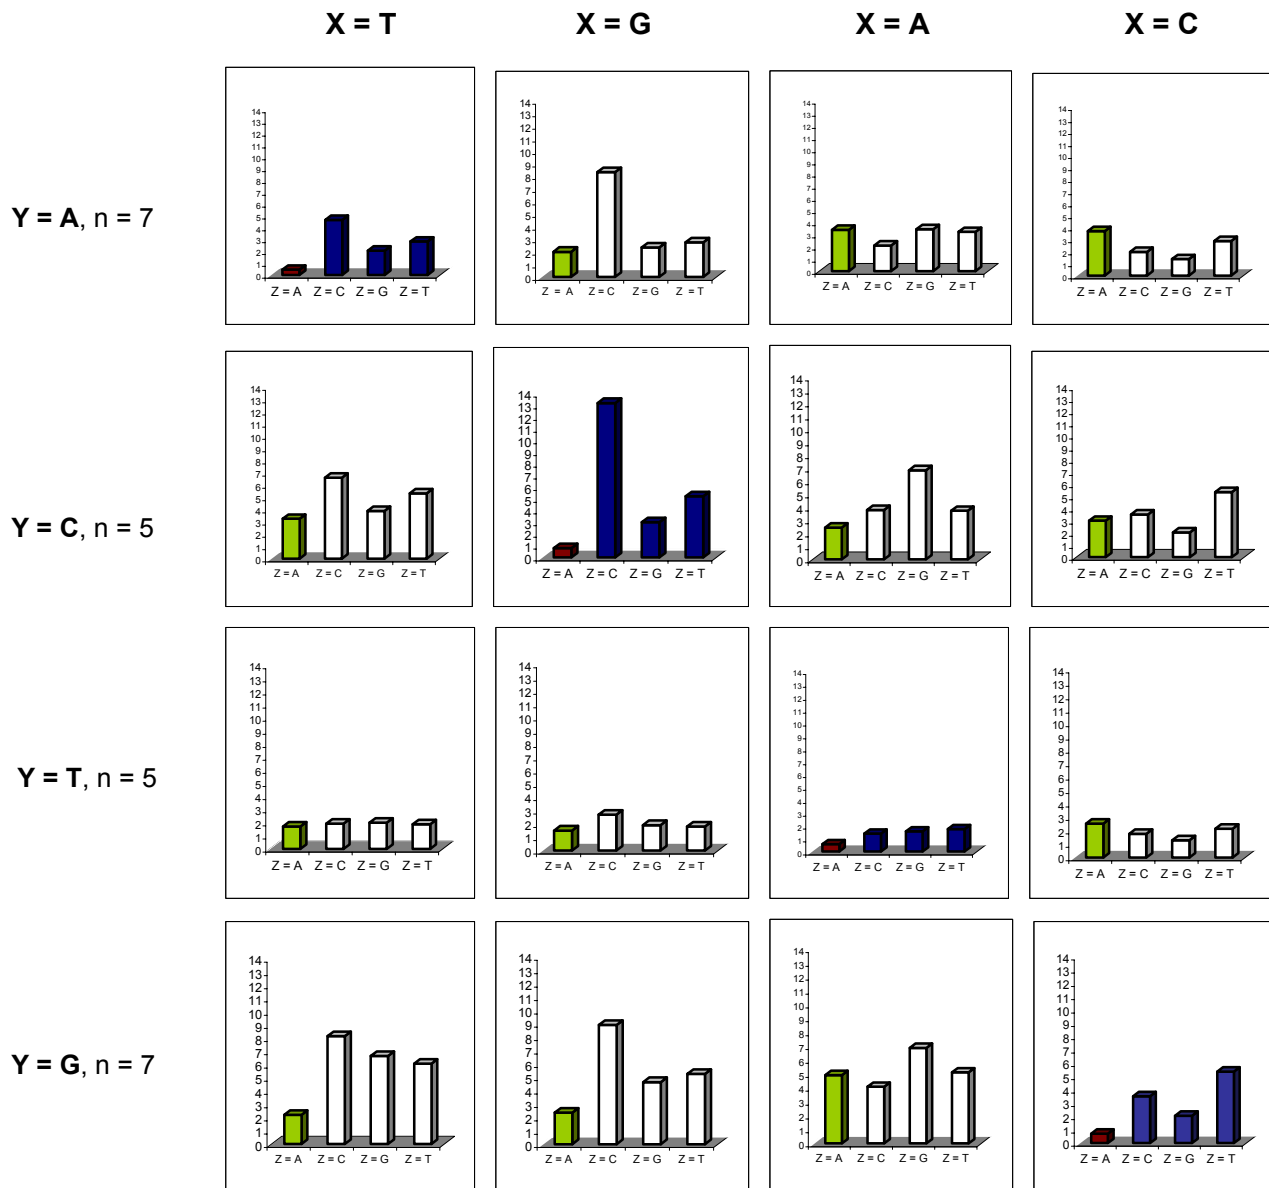

**Fig. 9.** Fluorescence duplex/fluorescence free probe. Concentrations were  $[C] = 1 \mu\text{M}$  (each strand) in a 5 mM sodium cacodylate buffer, pH = 6, containing 50 mM NaCl. 45 min hybridization at room temperature.

As previously observed at 6°C (Figure 5), the discrimination factor between the perfectly matched duplexes (red bars) and those involving terminal mismatches (green bars) on the same lines was also superior to 2 at room temperature (25°C). The values observed for the perfectly matched duplexes (red bars) were also inferior to those obtained for the duplexes involving a perfectly matched terminal base-pair and a penultimate mismatched one (blue bars on the same histograms) and also for the duplexes involving two terminal mismatched base-pairs (white bars). Among the combinations studied, the greatest fluorescence increases were observed when a CT mismatch was present at the penultimate position of the duplexes. Another observation was that the hybridization of the four ODN-TO' probes (each column of histograms) with each of the corresponding complementary target sequences gave, in all cases, the lowest fluorescence ratio for the perfect duplexes.

**Variation of the nucleic base V on the target sequences adjacent to the terminal base-pair of the duplex (on the side of TO' attachment):**

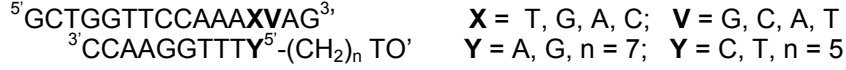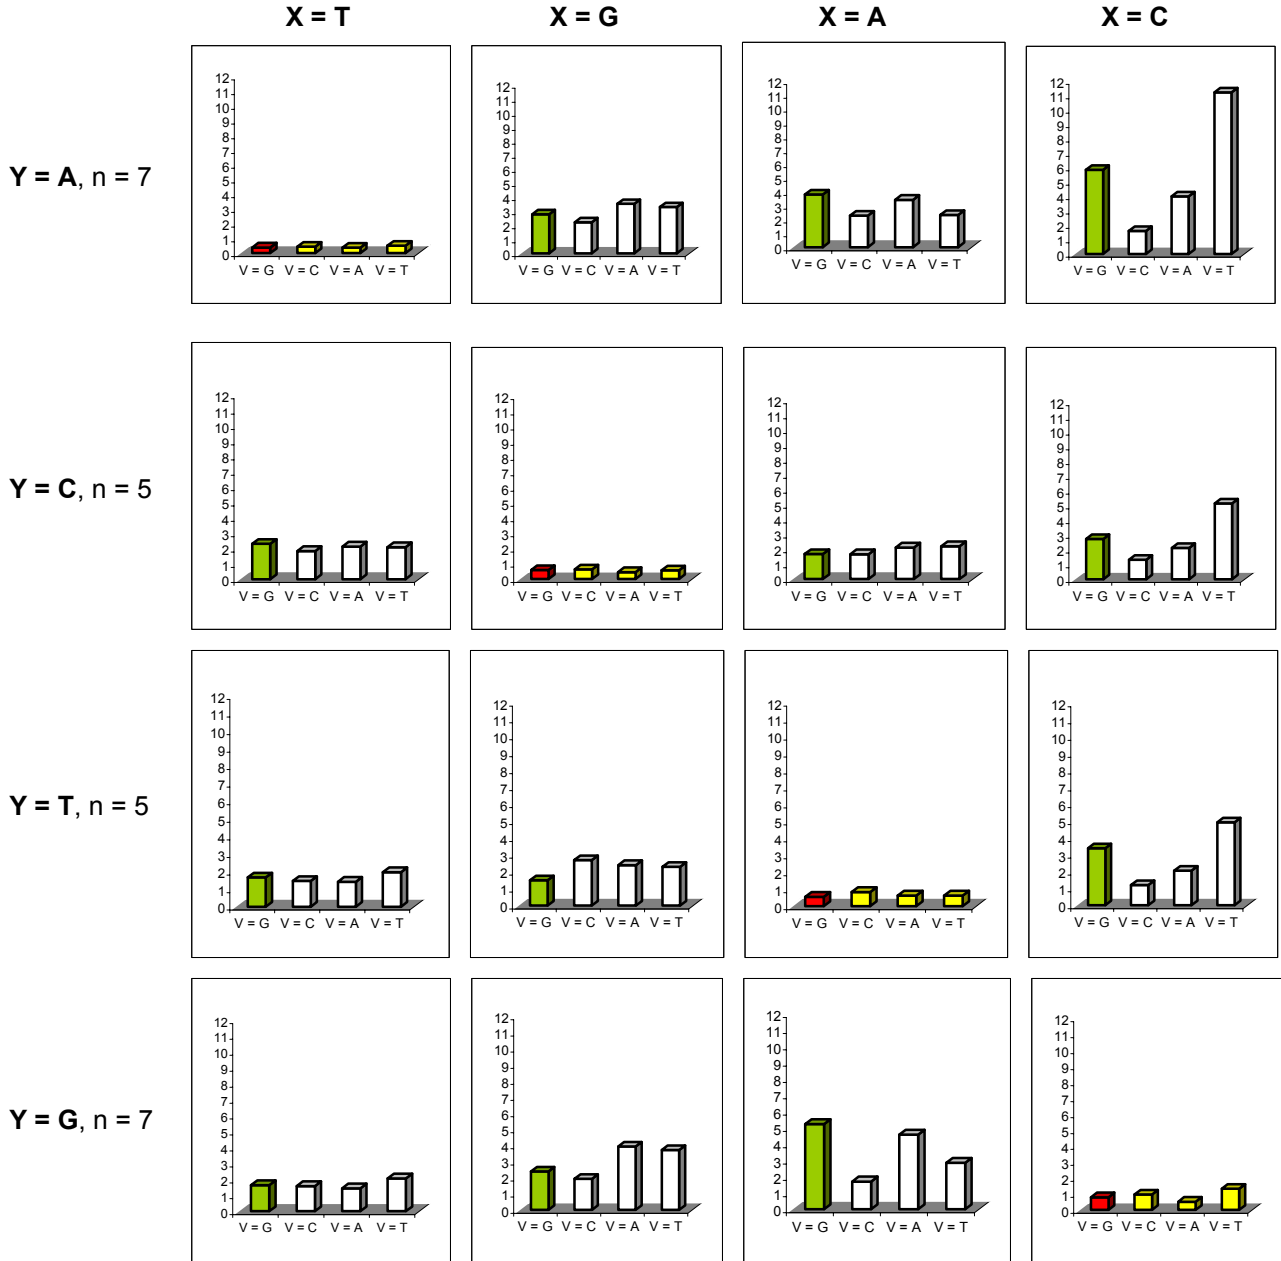

**Fig. 10.** Fluorescence duplex/fluorescence free probe. Concentrations were  $[C] = 1\mu\text{M}$  (each strand) in a 5 mM sodium cacodylate buffer, pH = 7, containing 50 mM NaCl. 30 min hybridization at room temperature.

Sixteen possibilities were studied. A comparison of the results showed that the perfect duplexes formed with the target studied above  $V = G$  (red bars) and the perfect duplexes formed with the other three targets  $V = C, A$  or  $T$  (yellow bars) could be discriminated from the corresponding mismatched ones [green bars ( $V = G$ ) and white bars ( $V = C, A$  or  $T$ )]. The fluorescence ratio for the duplexes involving terminal mismatches were higher than those corresponding to the perfect duplexes. The discrimination factor was at least equal or superior to 2 except when  $X$  and  $V$  were cytosines leading to a reduced value (between 1.7 and 1.4).
